# Supplementary material
Source: PubMed Central journal article supplement (PMC2778256)

**A**

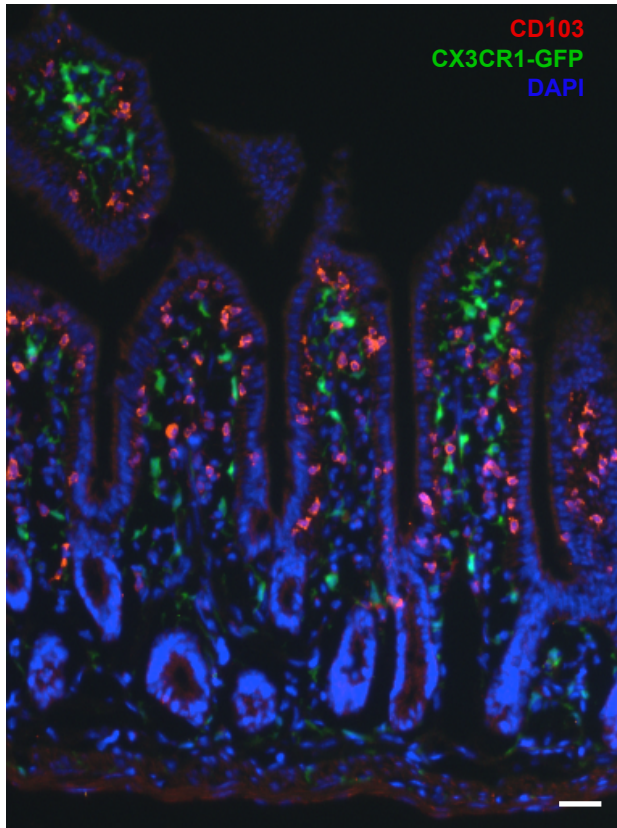

**B**

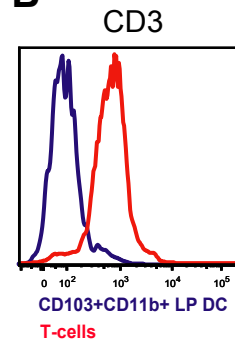

**C**

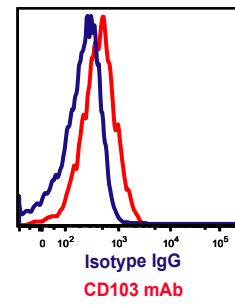

**Supplemental Figure 1**  
**Bogunovic M. et al**

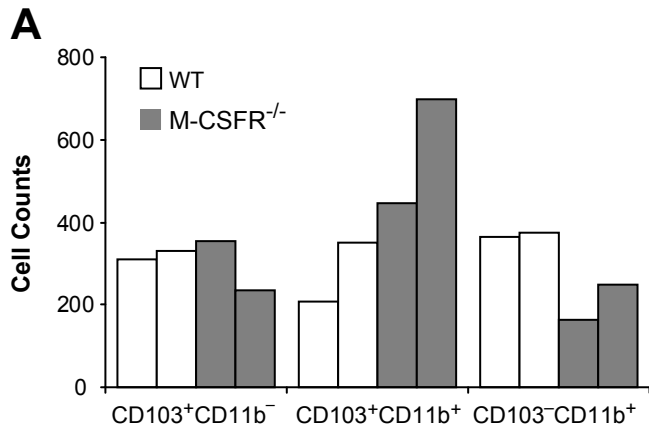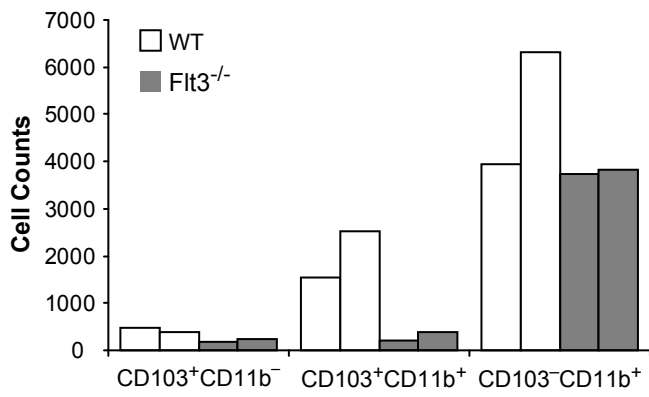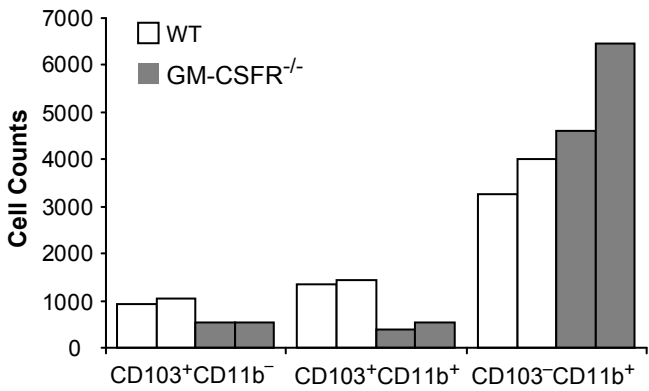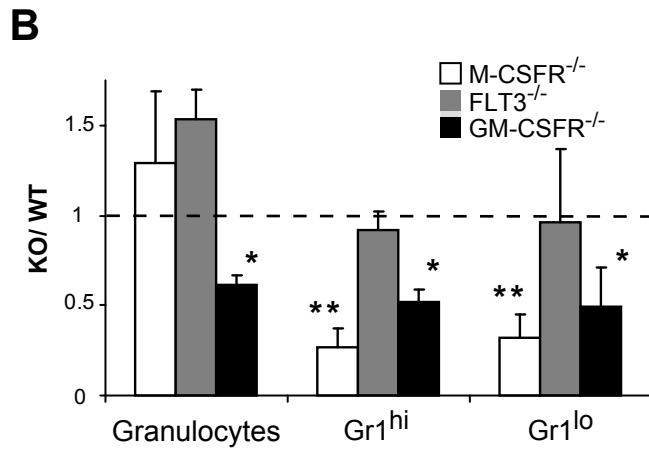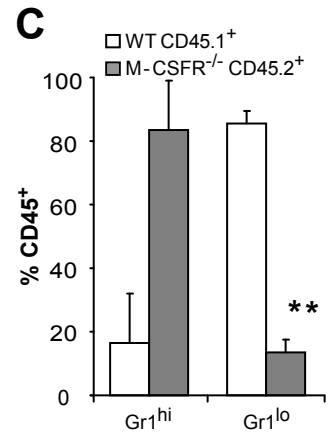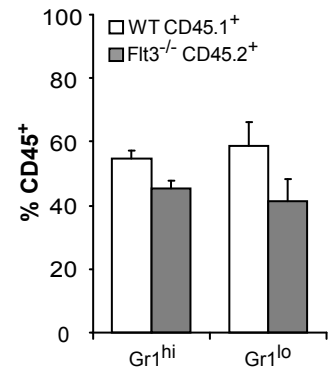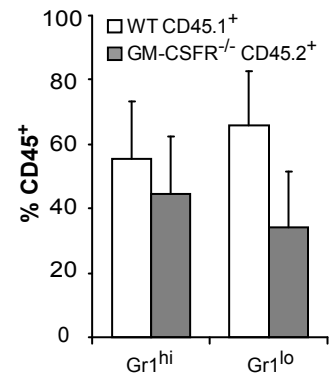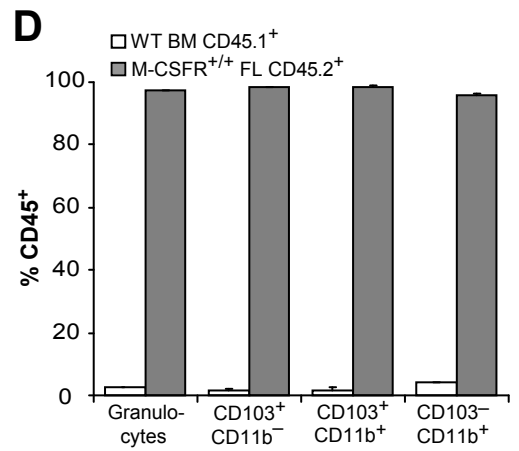

**Supplemental Figure 2**  
Bogunovic M. et al

Supplement: NIHMS144817-supplement-01.pdf [file NIHMS144817-supplement-01.pdf]
